# Supplementary material
Source: PubMed Central journal article supplement (PMC5045717)
Supplement: NIHMS69587-supplement-Supplementary_Information.pdf [file NIHMS69587-supplement-Supplementary_Information.pdf]

**Supplementary Information****Title: Mutations in *SNORD118* cause the cerebral microangiopathy leukoencephalopathy with calcifications and cysts****Authors:**

Emma M. Jenkinson<sup>1</sup>, Mathieu P. Rodero<sup>2</sup>, Paul R. Kasher<sup>1</sup>, Carolina Uggenti<sup>2</sup>, Anthony Oojageer<sup>1</sup>, Laurence C. Goosey<sup>1</sup>, Yohann Rose<sup>2</sup>, Christopher J. Kershaw<sup>3</sup>, Jill E. Urquhart<sup>1</sup>, Simon G. Williams<sup>1</sup>, Sanjeev Bhaskar<sup>1</sup>, James O'Sullivan<sup>1</sup>, Gabriela M. Baerlocher<sup>4,5</sup>, Monika Haubitz<sup>4,5</sup>, Geraldine Aubert<sup>6,7</sup>, Kristin W. Barañano<sup>8,9</sup>, Angela J. Barnicoat<sup>10</sup>, Roberta Battini<sup>11</sup>, Andrea Berger<sup>12,13</sup>, Edward M. Blair<sup>14</sup>, Janice E. Brunstrom-Hernandez<sup>15,16</sup>, Johannes A. Buckard<sup>17</sup>, David M. Cassiman<sup>18</sup>, Rosaline R.C. Caumes<sup>19</sup>, Duccio M. Cordelli<sup>20</sup>, Liesbeth M. De Waele<sup>21,22</sup>, Alexander J. Fay<sup>16</sup>, Patrick Ferreira<sup>23</sup>, Nicholas A. Fletcher<sup>24</sup>, Alan E. Fryer<sup>25</sup>, Himanshu Goel<sup>26,27</sup>, Cheryl A. Hemingway<sup>28</sup>, Marco Henneke<sup>29</sup>, Imelda Hughes<sup>30</sup>, Rosalind J. Jefferson<sup>31</sup>, Ram Kumar<sup>32</sup>, Lieven Lagae<sup>22</sup>, Pierre.G. Landrieu<sup>33</sup>, Charles M. Lourenço<sup>34</sup>, Timothy J. Malpas<sup>35</sup>, Sarju G. Mehta<sup>36</sup>, Imke Metz<sup>37</sup>, Sakkubai Naidu<sup>38</sup>, Katrin Öunap<sup>39,40</sup>, Axel Panzer<sup>41</sup>, Prab Prabhakar<sup>10</sup>, GeraldineQuaghebeur<sup>42</sup>, Raphael Schiffmann<sup>43</sup>, Elliot H. Sherr<sup>44</sup>, Kanaga.R. Sinnathuray<sup>45</sup>, Calvin Soh<sup>46</sup>, Helen S. Stewart<sup>14</sup>, John Stone<sup>47</sup>, Hilde Van Esch<sup>48</sup>, Christine E.G. Van Mol<sup>49</sup>, Adeline Vanderver<sup>50,51</sup>, Emma L. Wakeling<sup>52</sup>, Andrea Whitney<sup>53</sup>, Graham D. Pavitt<sup>3</sup>, Sam Griffiths-Jones<sup>3</sup>, Gillian I. Rice<sup>1</sup>, Patrick Revy<sup>54</sup>, Marjo S. van der Knaap<sup>55,56</sup>, John H. Livingston<sup>57</sup>, Raymond T. O'Keefe<sup>3</sup>, Yanick J. Crow<sup>1,2</sup>

**Affiliations:**

<sup>1</sup>Manchester Centre for Genomic Medicine, Institute of Human Development, Faculty of Medical and Human Sciences, Manchester Academic Health Sciences Centre, University of Manchester, UK.

<sup>2</sup>INSERM UMR 1163, Laboratory of Neurogenetics and Neuroinflammation, Paris Descartes – Sorbonne Paris Cité University, Institut Imagine, Hôpital Necker, Paris, France.

<sup>3</sup>Faculty of Life Sciences, University of Manchester, Michael Smith Building, Manchester, UK.

<sup>4</sup>University Clinic of Hematology and Central Hematology Laboratory, University Hospital Bern, Bern, Switzerland.

<sup>5</sup>Experimental Hematology, Department of Clinical Research, University of Bern, Bern, Switzerland.

<sup>6</sup>Repeat Diagnostics Inc, North Vancouver, British Columbia, Canada.

<sup>7</sup>Terry Fox Laboratory, British Columbia Cancer Agency, Vancouver, British Columbia, Canada.

<sup>8</sup>Department of Neurology, The Johns Hopkins University School of Medicine, Baltimore, MD, USA

<sup>9</sup>Division of Neurogenetics, Kennedy Krieger Institute, Baltimore, MD, USA

<sup>10</sup>Department of Clinical Genetics, Great Ormond Street Hospital NHS Foundation Trust, London, UK.

<sup>11</sup>Department of Developmental Neuroscience, IRCCS Stella Maris, Pisa, Italy.

<sup>12</sup>Department of Neuropediatrics, Klinikum Weiden, Weiden, Germany.

<sup>13</sup>Department of Neuropediatrics, Klinikum Harlaching, Munich, Germany.

<sup>14</sup>Department Of Clinical Genetics, Churchill Hospital, Oxford University NHS Trust. Oxford, UK.

<sup>15</sup>Director OR Pediatric Neurology, 1 CP Place, PLLC, Plano Texas USA.

<sup>16</sup>Department of Neurology, Washington University School of Medicine, St. Louis Children's Hospital, St. Louis, USA.

- <sup>17</sup>Department of Neuropediatrics, Sozialpädiatrisches Zentrum am EVK Düsseldorf, Düsseldorf, Germany.
- <sup>18</sup>Metabolic Center, Leuven University Hospitals and KU Leuven, Leuven, Belgium.
- <sup>19</sup>Department of Neuropediatrics, Hopital Roger Salengro, Lille, France.
- <sup>20</sup>Paediatric Neurology Unit, S. Orsola-Malpighi Hospital, Bologna, Italy.
- <sup>21</sup>Department of Paediatric Neurology, University Hospitals Leuven, Leuven, Belgium.
- <sup>22</sup>Department of Development and Regeneration, Catholic University of Leuven, Leuven, Belgium.
- <sup>23</sup>Division of Medical Genetics, Alberta Children's Hospital, Shaganappi Trail NW, Calgary, Canada.
- <sup>24</sup>Department of Neurology, The Walton Centre NHS Foundation Trust, Liverpool, UK.
- <sup>25</sup>Department of Clinical Genetics, Liverpool Women's NHS Foundation Trust, Liverpool, UK.
- <sup>26</sup>Hunter Genetics, Hunter New England Local Health District, Waratah, Australia.
- <sup>27</sup>School of Medicine and Public Health, University of Newcastle, Callaghan, Australia.
- <sup>28</sup>Department of Paediatric Neurology, Great Ormond Street Hospital NHS Foundation Trust, London, UK.
- <sup>29</sup>Department of Pediatrics and Adolescent Medicine, University Medical Center, Georg August University, Göttingen, Germany
- <sup>30</sup>Pediatric Neurology, Central Manchester University Hospitals NHS Foundation Trust, Manchester, UK.
- <sup>31</sup>Dingley Specialist Children's Centre, Royal Berkshire Hospital, Reading, UK.
- <sup>32</sup>Department of Paediatric Neurology, Alder Hey Children's NHS Foundation Trust, Liverpool, UK.
- <sup>33</sup>Paediatric Neurology, CHU Paris-Sud Bicetre, Le Kremlin Bicetre, France, 94270.
- <sup>34</sup>Neurogenetics Division, Clinics Hospital of Ribeirão Preto, University of São Paulo, São Paulo, Brazil.
- <sup>35</sup>Department of Paediatrics, Jersey General Hospital, St Helier, Jersey.
- <sup>36</sup>East Anglian Regional Genetics Service, Addenbrookes Hospital, Cambridge, UK.
- <sup>37</sup>Department of Neuropathology, University Medical Center, Georg August University, Göttingen, Germany.
- <sup>38</sup>Johns Hopkins Medical Institutions, Neurogenetics Unit, Hugo Moser Research Institute, Kennedy Krieger Institute, Baltimore, USA.
- <sup>39</sup>Department of Genetics, Tartu University Hospital, Tartu, Estonia.
- <sup>40</sup>Department of Pediatrics, University of Tartu, Tartu, Estonia.
- <sup>41</sup>Epilepsiezentrum/ Neuropädiatrie, Hedwig von Rittberg Zentrum für Kinder und Jugendliche, DRK Kliniken Berlin-Westend, Berlin, Germany
- <sup>42</sup>Department of Neuroradiology, Oxford University Hospitals NHS Foundation Trust, Oxford, UK
- <sup>43</sup>Institute of Metabolic Disease, Baylor Research Institute, Dallas, Texas, USA.
- <sup>44</sup>Department of Neurology, UCSF, San Francisco, CA, USA.
- <sup>45</sup>Department of Paediatrics, Wexham Park Hospital, Slough, UK
- <sup>46</sup>Neuroradiology Department, Salford Royal NHS Foundation Trust, Salford, UK.
- <sup>47</sup>Department of Clinical Neurosciences, University of Edinburgh, Western General Hospital, Edinburgh, UK.
- <sup>48</sup>Center for Human Genetics, University Hospitals Leuven, KU Leuven, Leuven, Belgium.
- <sup>49</sup>Department of pediatrics-neonatology, St. Augustinusziekenhuis, Oosterveldlaan 24, Wilrijk, Belgium.
- <sup>50</sup>Department of Neurology, George Washington University School of Medicine, Children's National Health System, Washington DC, USA.
- <sup>51</sup>Center for Genetic Medicine Research, George Washington University School of Medicine, Children's National Health System, Washington DC, USA.
- <sup>52</sup>North West Thames Regional Genetics Service, North West London Hospitals NHS Trust, Harrow, UK.
- <sup>53</sup>Department of Child Neurology, University Hospital Southampton NHS Trust, Southampton, UK.

<sup>54</sup>INSERM UMR 1163, Laboratory of Genome Dynamics in the Immune System, Paris; Paris Descartes–Sorbonne Paris Cite University, Imagine Institute, Paris.

<sup>55</sup>Child Neurology and Neuroscience Campus Amsterdam, VU University Medical Center, Amsterdam, The Netherlands.

<sup>56</sup>Functional Genomics, Center for Neurogenomics and Cognitive Research, VU University, Amsterdam, The Netherlands.

<sup>57</sup>Department of Paediatric Neurology, Leeds General Infirmary, Leeds, UK.

Correspondence should be addressed to Yanick J. Crow ([yanickcrow@mac.com](mailto:yanickcrow@mac.com))

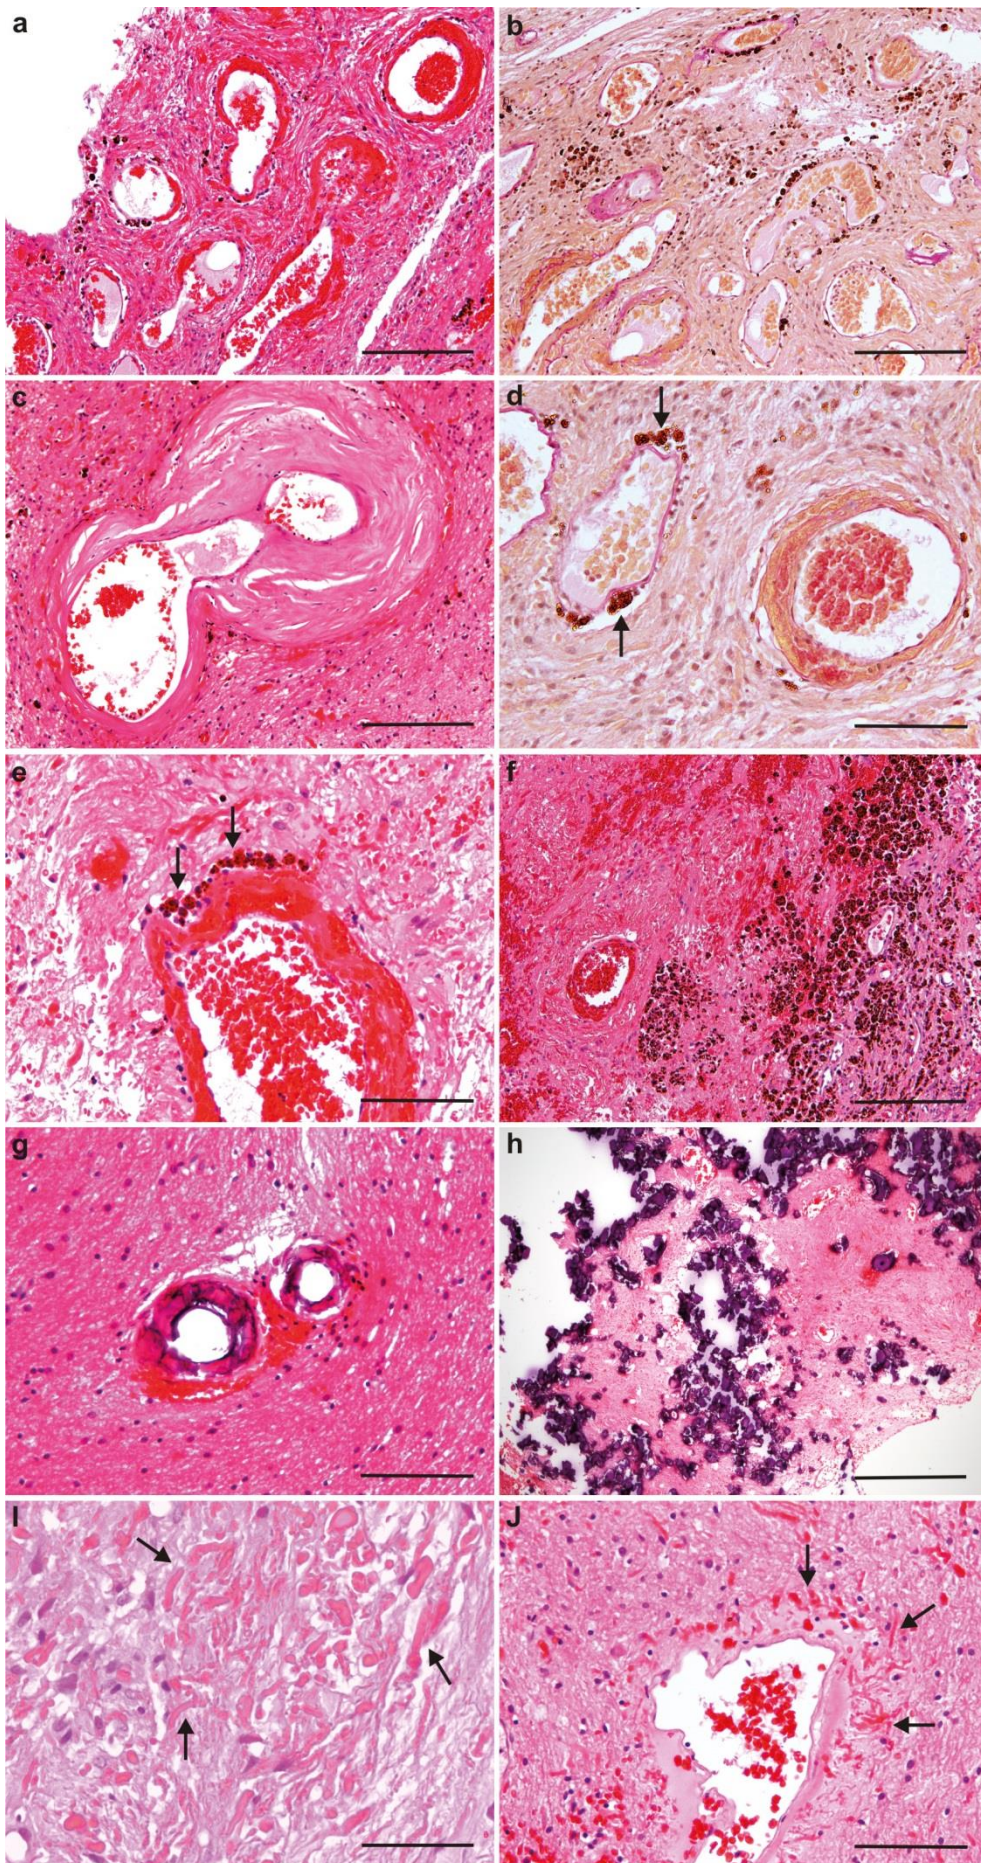

**Supplementary Figure 1. Histopathological characteristics of LCC.** Cerebellar brain biopsy taken from F1172 at the age of 50 years showing numerous blood vessels, with groups of vessels which resemble angioma (**a, b**). The vessels appear ectatic, partially thickened, hyalinized and demonstrate an irregular vessel wall (**c, d**). Inflammatory changes are not evident. Numerous macrophages with hemosiderin deposits around vessels (**d, e**, see arrows) and diffusely within the tissue (**f**) indicate old hemorrhage. Both vascular (**g**) and parenchymal (**h**) mineralization is seen. An extensive gliosis with strikingly high numbers of Rosenthal fibers are present in the parenchyma (**i**, some of which are indicated by arrows) and around vessels (**j**, marked with arrows). Stainings: Hematoxylin and eosin: a, c, e - j; Elastica van Gieson: b, d. Scale bars: a - c, f: 200  $\mu\text{m}$ ; d, e, g, j: 100  $\mu\text{m}$ ; h: 500  $\mu\text{m}$ ; i: 50  $\mu\text{m}$ .

## Disease [Pairs]

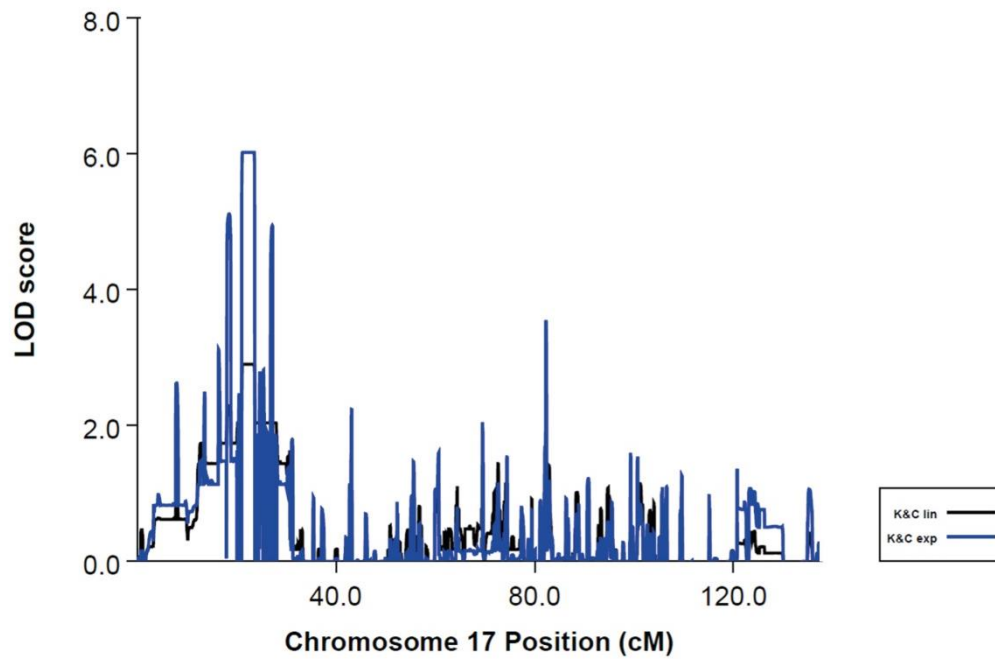

**Supplementary Figure 2. Linkage analysis in seven families.** Nonparametric linkage analysis was performed using the Merlin package in five pairs of affected siblings (F331, F426, F454, F521, F780) born to unrelated parents, and two singletons (F344 and F446) who were the product of independent consanguineous unions. K&C lin = Kong and Cox linear model; K&C exp = Kong and Cox exponential model.

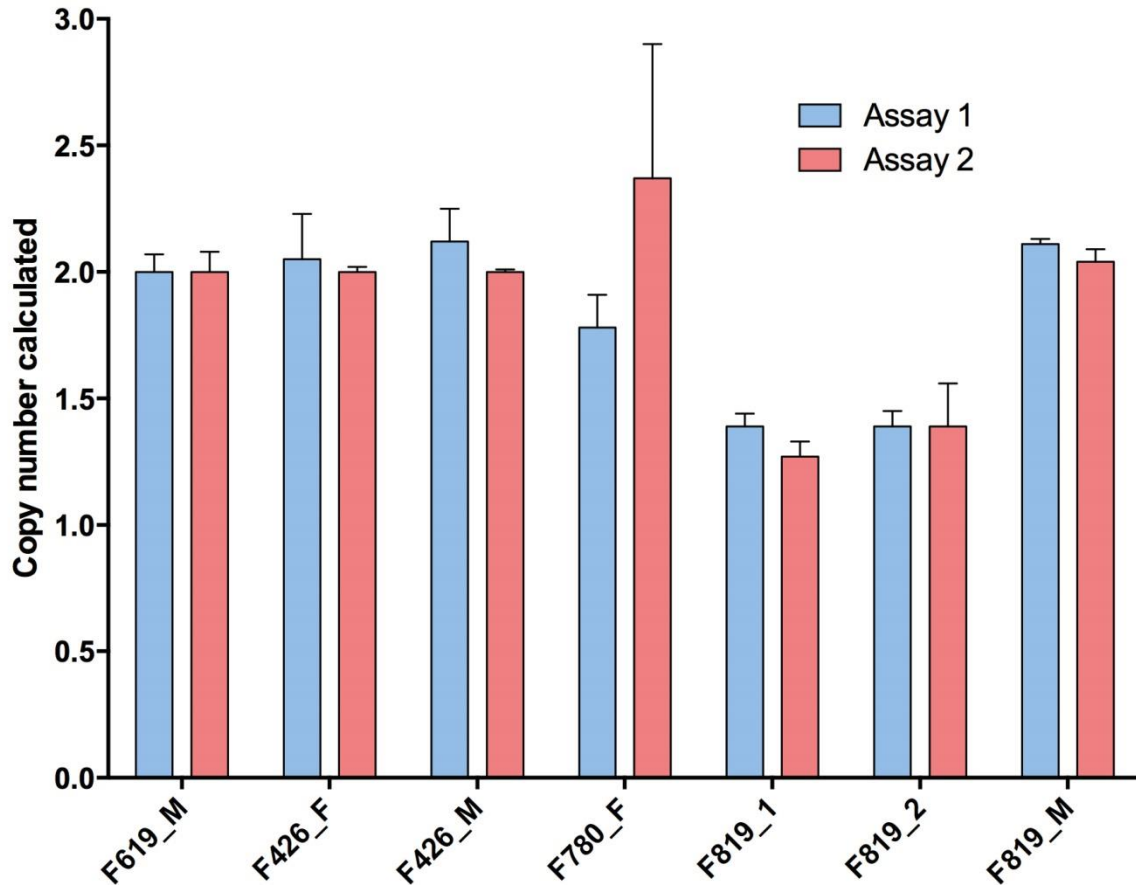

**Supplementary Figure 3. *SNORD118* copy number analysis in F819.** Copy number analysis was assessed in F819 using DNA from the two affected individuals (F819\_1, F819\_2) and their mother (F819\_M: paternal DNA not available). These data indicate a loss of the paternally-derived allele in the affected individuals. The parents from 3 other LCC families were used as comparators, with F619\_M chosen as the calibrator sample.

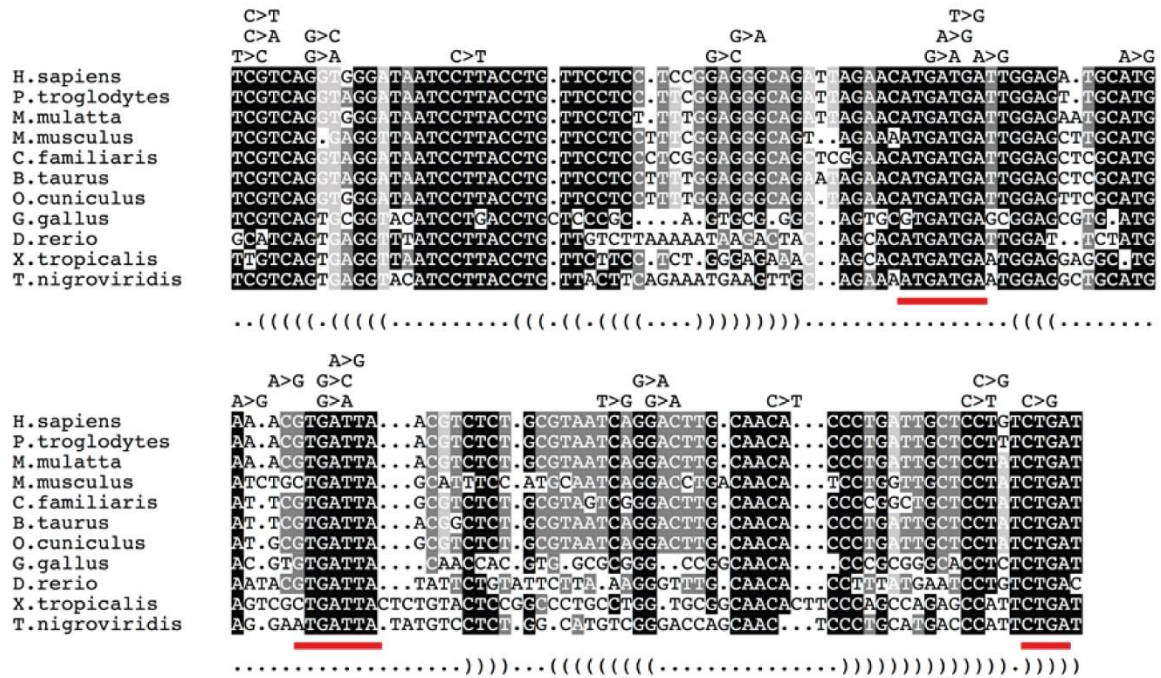

**Supplementary Figure 4. Multiple sequence alignment of *SNORD118* sequences.** *SNORD118* homologs were identified using Ensembl and Rfam, aligned using CLUSTALW, and the alignment manually refined using RALEE. Nucleotide alterations (not including deletions/insertions/duplications) identified in patients with LCC are annotated above the sequence. From 5' to 3', the C box, LsM binding sites and D box are highlighted by red lines. Aligned columns are coloured according to their sequence conservation: black (>80% identity), dark gray (>60% identity), and light gray (greater than 40% identity). A possible base-paired secondary structure, based on the consensus U8 structure in the Rfam database and analysis with RNAalifold, is shown in dot-bracket notation below the alignment. Homo sapiens (ENST00000363593); P. troglodytes, Pan troglodytes (ENSPTRT00000052278); M. mulatta, Macaca mulatta (ENSMMUT00000034372); B. taurus, Bos taurus (ENSBTAT00000060500); C. familiaris, Canis familiaris (ENSCAFT00000034685); M. musculus, Mus musculus (ENSMUST00000082965); O. cuniculus, Oryctolagus cuniculus (ENSOCUT00000018667); G. gallus, Gallus gallus (ENSGALT00000043652); X. tropicalis, Xenopus tropicalis (ENSXETT00000065858); T. nigroviridis, Tetraodon nigroviridis (ENSTNIT00000023953); D. rerio, Danio rerio (ENS DART00000115749).



|           |                                                                         |        |
|-----------|-------------------------------------------------------------------------|--------|
| U8/96-124 | GUAAUCAGGACUUGCAACACCCUGAUUGC<br>((((((((((.....))))))))))              | -10.30 |
| 100 U/G   | GUAAC <sup>C</sup> CAGGACUUGCAACACCCUGAUUGC<br>((((((.....))))))        | -5.60  |
| 103 G/A   | GUAAUCA <sup>A</sup> GACUUGCAACACCCUGAUUGC<br>(((((((.....).))))))      | -3.70  |
| 104 G/A   | GUAAUCAG <sup>A</sup> ACUUGCAACACCCUGAUUGC<br>((((((((((.....)))))))))) | -6.80  |

**Supplementary Figure 5. *In silico* analysis of LCC patient variants.** *In silico* analysis of variants located in the stem of a highly conserved hairpin loop from the predicted structure of U8. Bases 96-124 of the wildtype sequence of U8 are shown with patient variants underneath. The predicted base-paired secondary structure of each sequence is shown in dot-bracket notation, together with the minimum folding free energy (kcal/mol). Each of the three variants detected in LCC patients is predicted to decrease the stability of the hairpin.

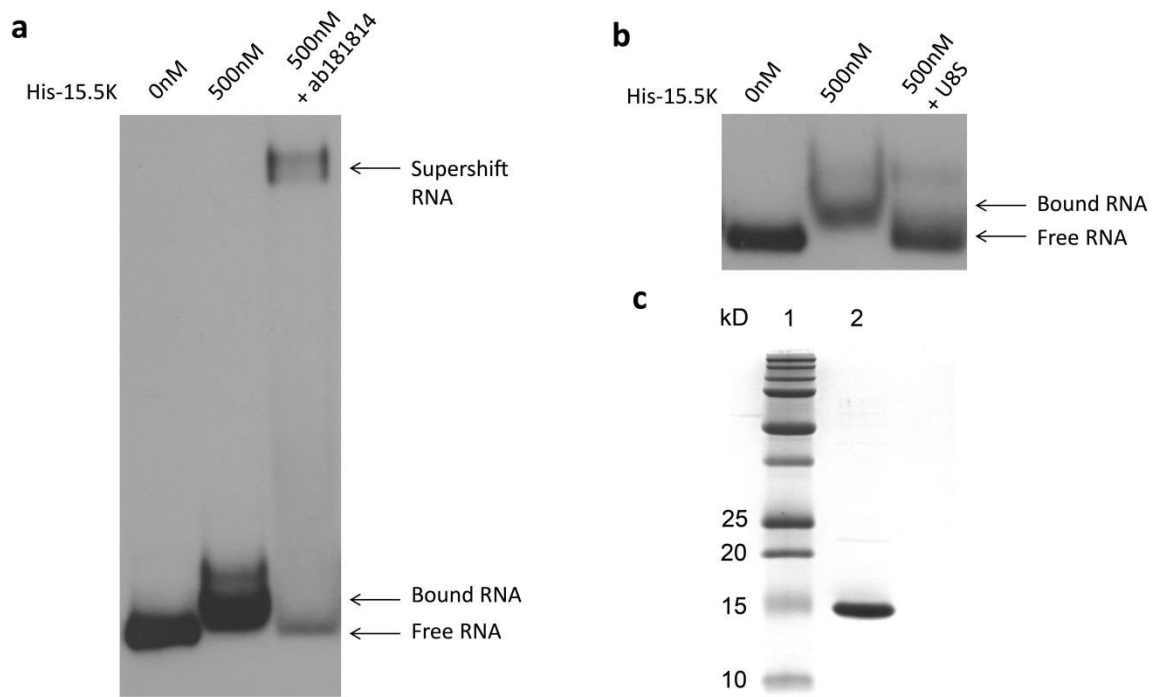

**Supplementary Figure 6. 15.5K-U8 snoRNA EMSA control experiments. (a)** Addition of a 6XHis antibody (ab181814) causes a super-shift demonstrating that the observed shift in U8 RNA is a result of binding to His-15.5K. **(b)** A competition assay to demonstrate binding specificity. An excess of unlabeled *in vitro* transcribed WT U8 RNA (2.5ug) is sufficient to out-compete 5' end-labeled *in vitro* transcribed U8 RNA and eliminate the band shift. **(c)** Coomassie stained gel showing purified His-15.5K protein. Lane 1 = Precision plus protein dual colour standard (Biorad), lane 2 = purified His-15.5K protein.

**a**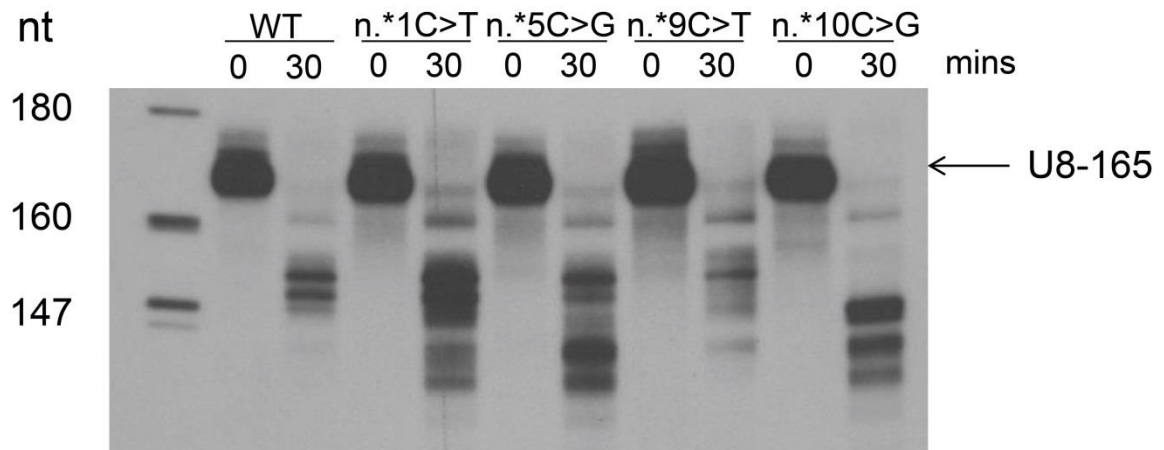**b**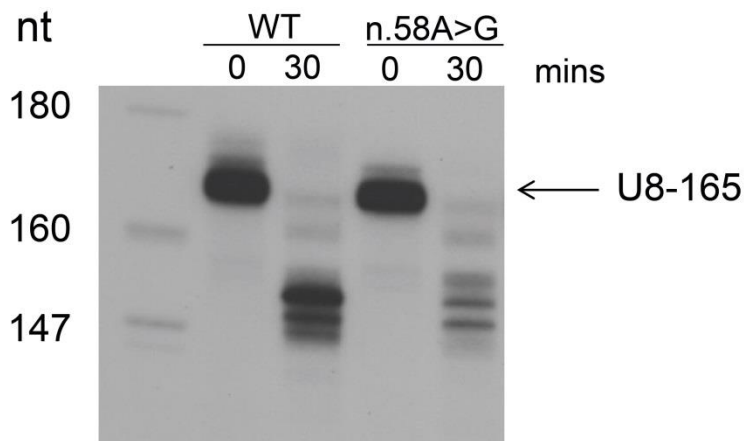

**Supplementary Figure 7. U8 snoRNA precursor processing control experiments. (a)** 3' end precursor processing of precursor U8 variants in the absence of RNasin. Removal of commercially available RNase inhibitors (RNasin, Promega) does not alter the *in vitro* 3' end processing of 5' end labeled precursor U8 snoRNA (U8-165) in HeLa nuclear extracts. **(b)** 3' end precursor processing of 5' end labeled precursor U8 variant n.58A>G. At 30 minutes the pattern of processing intermediates is the same as WT RNA.

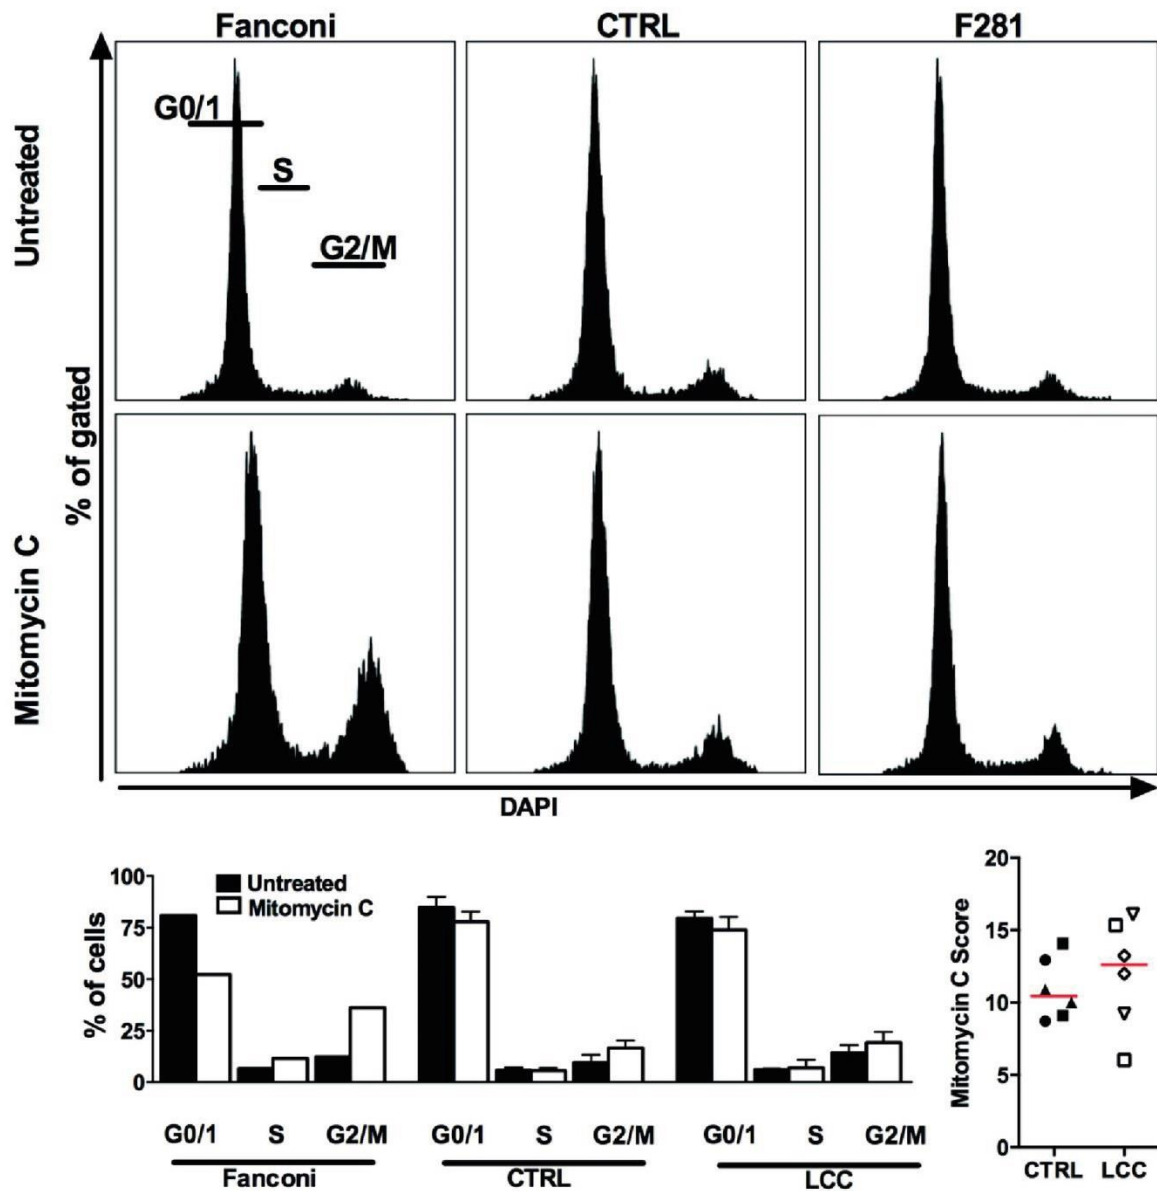

**Supplementary Figure 8. Cell cycle analysis.** Comparison of the effect of mitomycin C treatment on cell cycling in primary fibroblasts from a patient with Fanconi anemia (n = 1) (positive control), LCC patients (n = 3) and healthy controls (n = 3). Upper panel: representative histogram of DNA content in untreated and mitomycin C treated cells. Lower left panel: Bar graph representation of the percentage of treated or untreated cells in G0/1, S or G2M phase. Data shown are mean  $\pm$  SEM. Lower right panel: In order to be able to compare the effect of mitomycin C on cell cycling between controls and LCC patients, compared to cells from a patient with Fanconi anemia, we calculate a mitomycin score with the following formula:  $(\% \text{ of increase of S + G2M phase fraction after treatment} / \% \text{ of increase of S + G2M phase fraction of Fanconi cells after treatment}) \times 100$ . No significant difference by Mann Whitney U testing; n = 2 experiments.

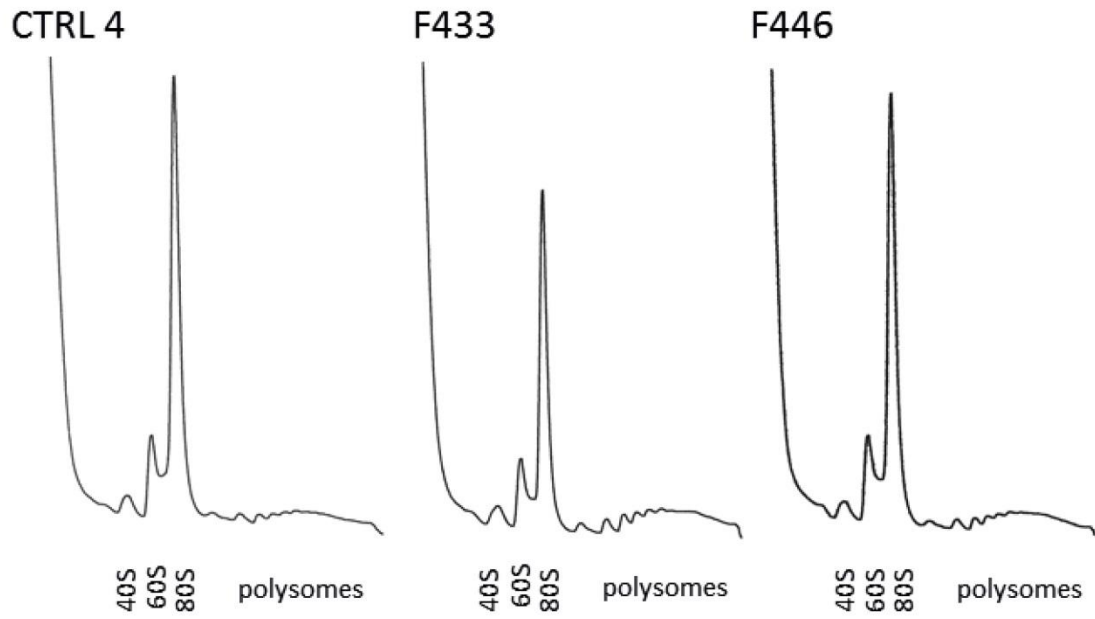

**Supplementary Figure 9. Polysome analysis in** lymphoblast cell lines (LCLs). Polysome profiles in extracts of Epstein Barr virus (EBV) transformed LCLs. Extracts from two patient lines were compared to a healthy control and did not demonstrate consistent abnormalities in translation efficiency.

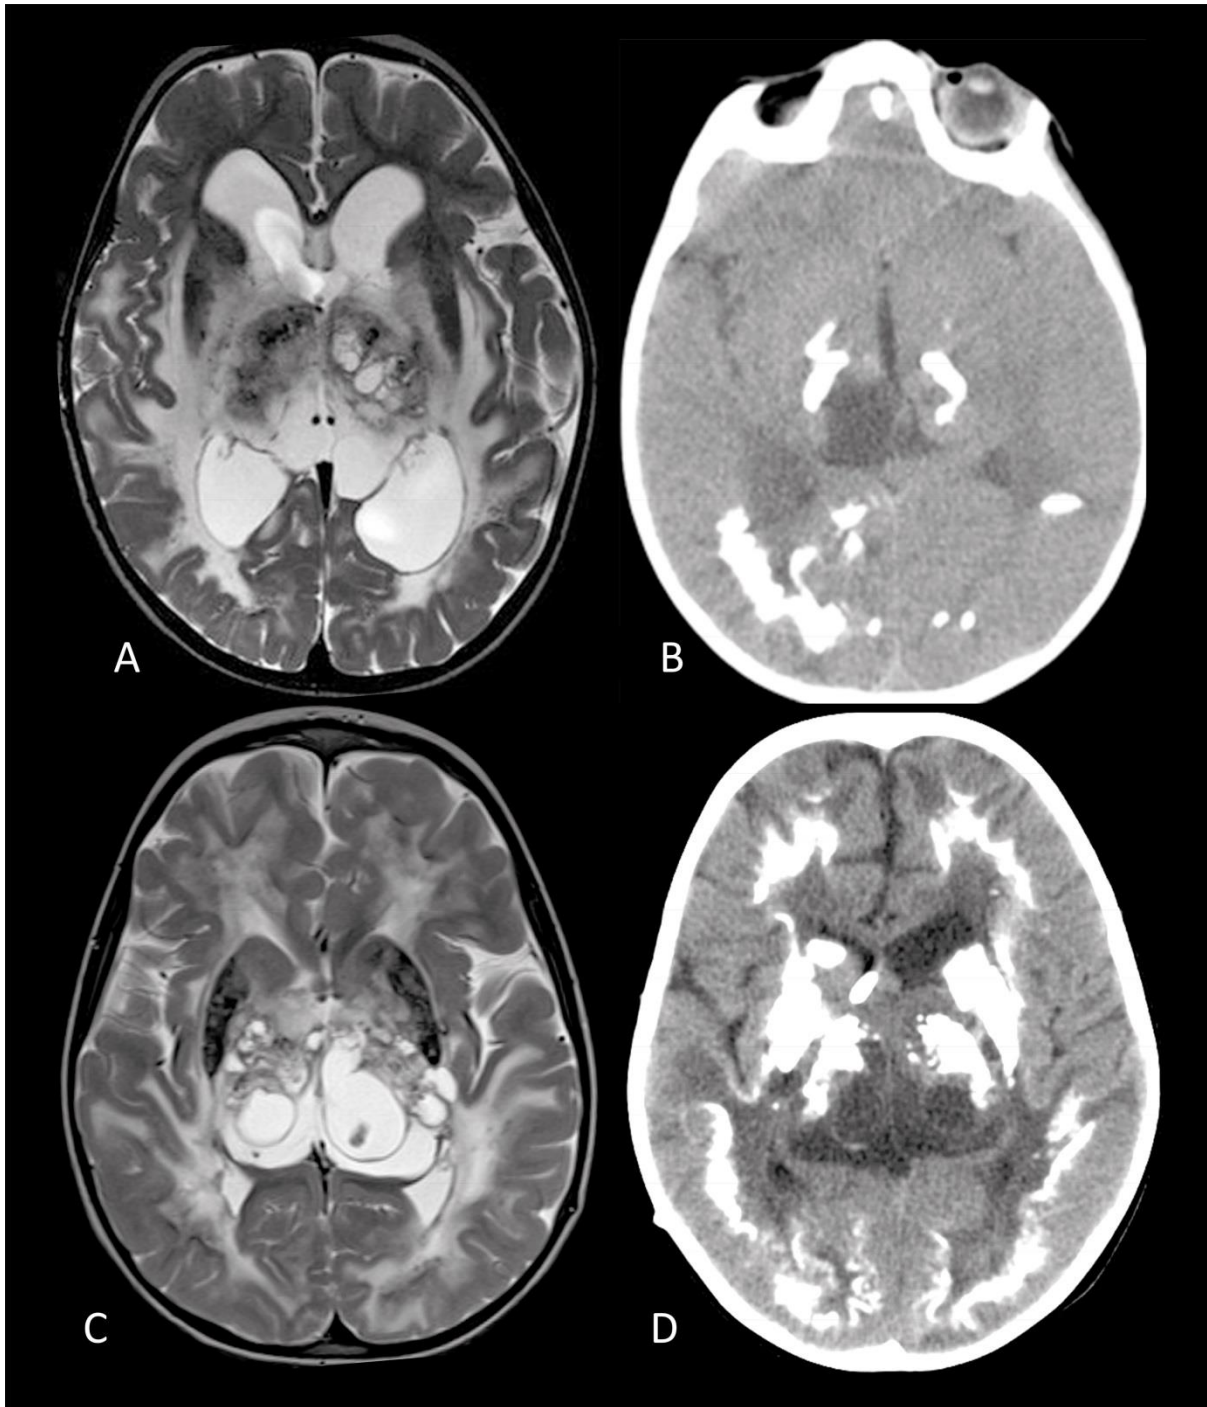

**Supplementary Figure 10. Comparison of neuroimaging in patients with CP due to *CTC1* mutations (A and B) and LCC due to mutations in *SNORD118* (C and D; F172).** Axial T2 MR of patient with CP (A) and LCC (C) demonstrating a similar appearance with leukoencephalopathy, calcification and cysts. CT (B and D) images are also largely similar with dense thalamic and deep cortical calcification. There is more extensive calcification in the patient with LCC (D).

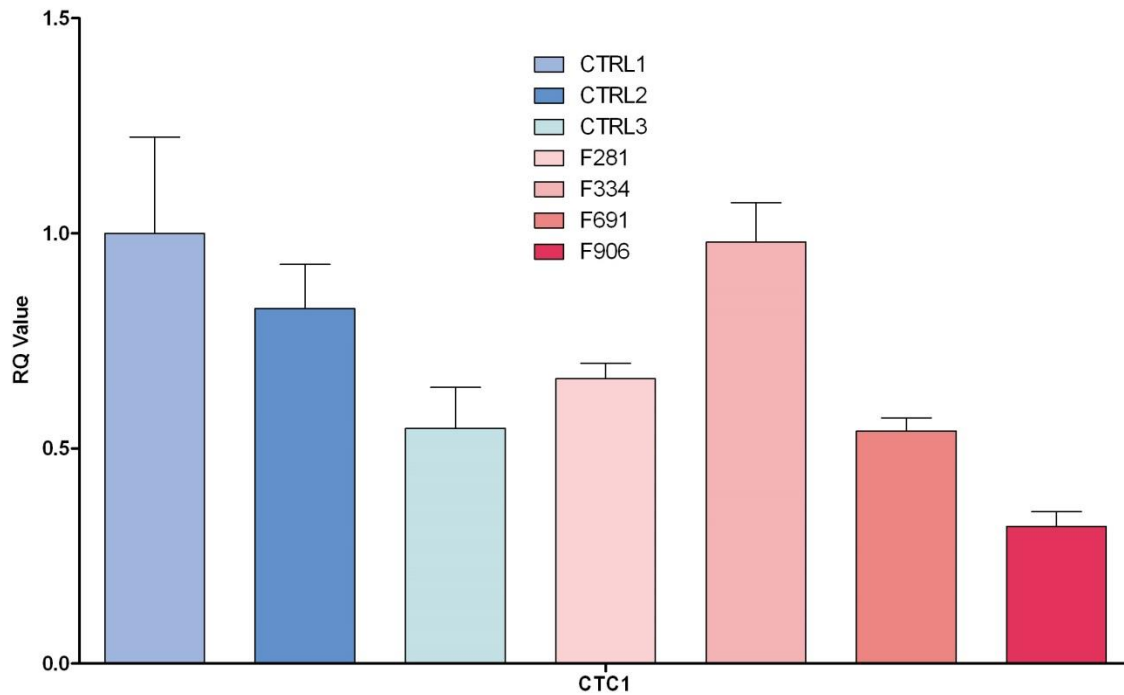

**Supplementary Figure 11. *CTC1* expression in LCC patients and controls.** Quantitative reverse transcription PCR (qPCR) of *CTC1* expression in three control and four LCC patient primary fibroblast cell lines, normalized to two housekeeping genes, *HPRT1* and *18S*. RQ is equal to  $2^{-\Delta\Delta C_t}$  i.e. the normalized fold change relative to a control.

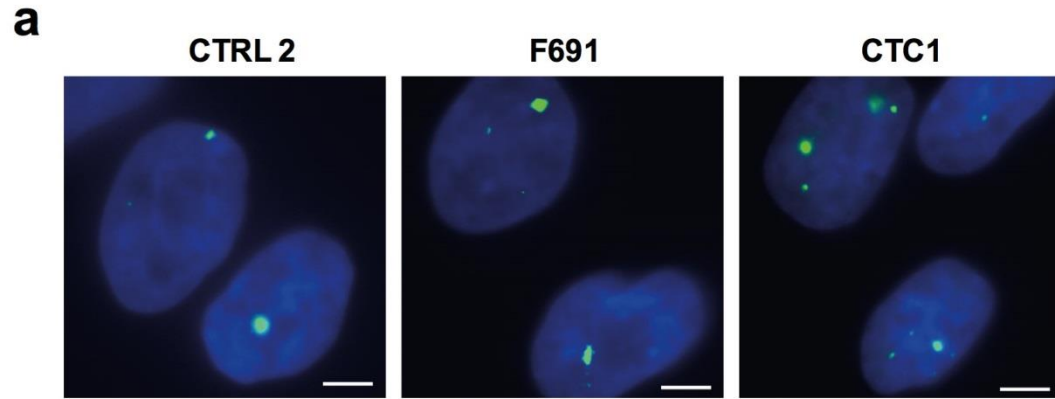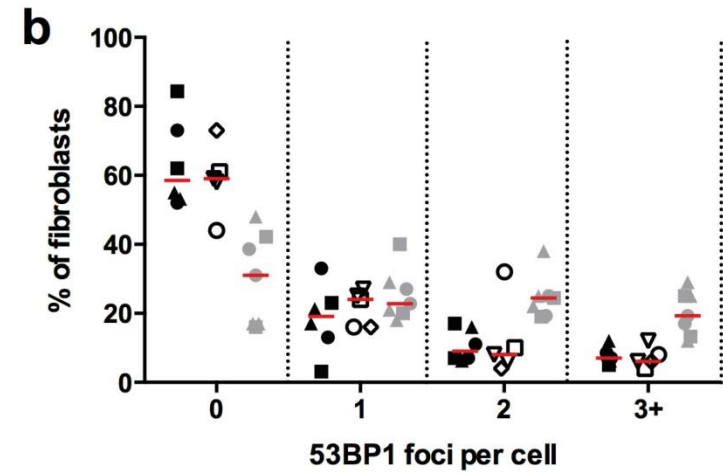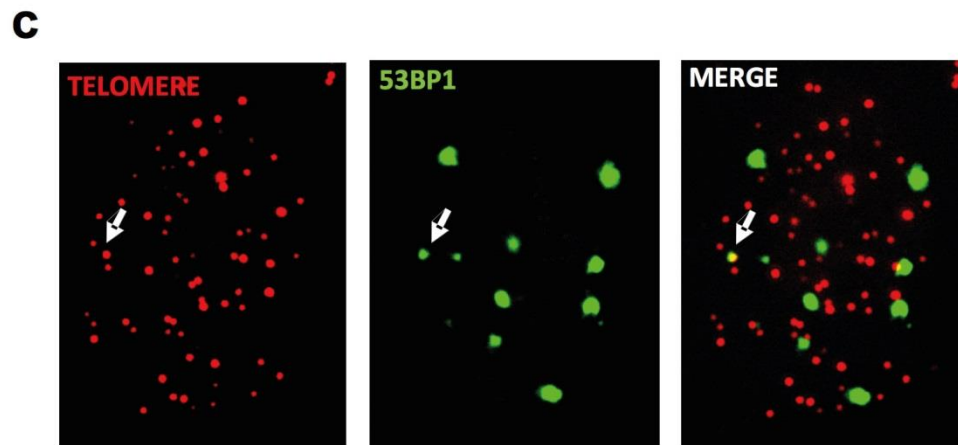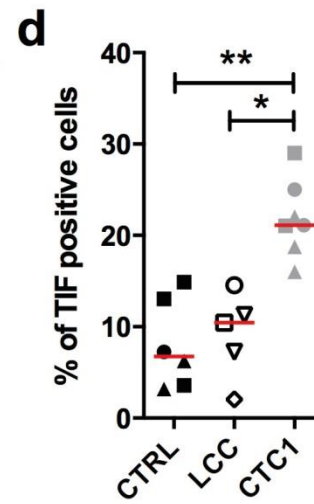



**Supplementary Figure 12. 53BP1 and telomere dysfunction-induced foci (TIF).** (a). Representative images of 53BP1 staining of control, LCC and CTC1 primary fibroblasts. Scale bar represents 2.5  $\mu$ M. (b). Comparison of the number of 53BP1 foci in primary fibroblasts from healthy controls (n = 3), LCC patients (n = 4) and CTC1 patients (n = 3). Red bar represents median value for each group. n = 2 independent experiments. (c). Representative images of a TIF are displayed for a control, LCC and CTC1 cell line. Scale bar represents 2.5  $\mu$ M. (d). Comparison of the number of TIF in primary fibroblasts from CTC1 patients (n = 3), LCC patients (n = 4) and healthy controls (n = 2). Red bar represents the median value for each group. Data derived from n = 3 independent experiments and is grouped. Kruskal-Wallis with Dunn's multiple comparison test \* $p$ <0.05; \*\*  $p$ <0.01. No significant difference between LCC patients and controls. ●CTRL1, ■CTRL2, ▲CTRL3, ◇F281, ○F334, □F691, ▽F906, ▲F385, ●F1314\_1, ■F1314\_2.

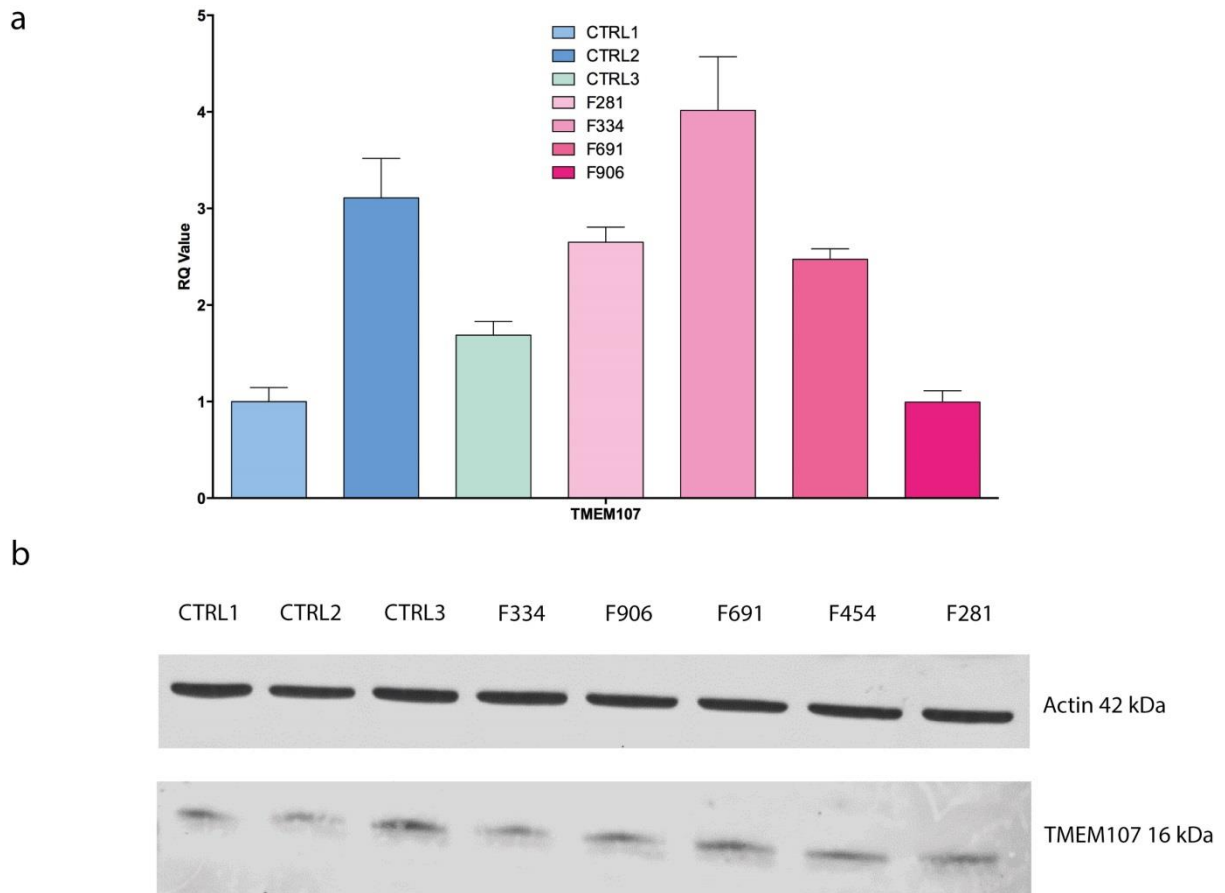

**Supplementary Figure 13. *TMEM107* / *TMEM107* expression (RNA / protein). (a).** Quantitative reverse transcription PCR (qPCR) of *TMEM107* expression in three control and four LCC patient primary fibroblast cell lines, normalized to two housekeeping genes, *HPRT1* and *18S*. RQ is equal to  $2^{-\Delta\Delta C_t}$  i.e. the normalized fold change relative to a control. **(b).** Western blot of *TMEM107* in primary fibroblasts from three control and five LCC patient cell lines. Whole cell lysates were derived from  $5 \times 10^6$  cells per sample and 30  $\mu\text{g}$  total protein loaded per lane. Immunoblotting of actin (42kDa) was used as a loading control.

| Patient | Sex | Ethnicity                       | Parental consanguinity | Family history           | Age at presentation | Presenting feature                                                                                               | Current age / age at death | Current status if alive                                                |
|---------|-----|---------------------------------|------------------------|--------------------------|---------------------|------------------------------------------------------------------------------------------------------------------|----------------------------|------------------------------------------------------------------------|
| F172    | M   | White European (Swedish)        | No                     | No                       | 8 weeks             | Epileptic seizures                                                                                               | Alive at age 11 years      | Severe developmental delay                                             |
| F278    | M   | White European (North American) | No                     | No                       | 1 year              | Significant developmental delay and seizures                                                                     | Died at age 16 years       | Progressive neurological decline                                       |
| F281    | M   | White European (Estonian)       | No                     | No                       | 4 years             | Abnormal head posture                                                                                            | Alive at age 11 years      | Unilateral pyramidal signs                                             |
| F285    | M   | White European (British)        | No                     | No                       | 12 years            | Focal epileptic seizures                                                                                         | Died at age 32 years       | Increasing spasticity; seizures; emotional lability                    |
| F309    | F   | White European (North American) | No                     | No                       | 2 years             | Failure to achieve motor milestones                                                                              | Alive at age 22 years      | Progressive spasticity and dystonia with complete loss of speech       |
| F330    | M   | White European (British)        | No                     | No                       | 3 years             | Unilateral tremor                                                                                                | Alive at age 18 years      | 4 limb dystonia and severe cognitive impairment                        |
| F331_1  | F   | White European (German)         | No                     | 1 of 2 affected siblings | 2 years             | Prolonged febrile seizures                                                                                       | Alive at age 19 years      | Progressive gait disturbance, ataxia, dysarthria, cognitive impairment |
| F331_2  | F   | White European (German)         | No                     | 1 of 2 affected siblings | 5 months            | Identified as a neonate to have intracranial calcification. Presented age 5 months with focal epileptic seizures | Died at age 15 years       | Progressive dystonia, ataxia, spasticity, severe mental retardation    |
| F334    | F   | White                           | No                     | No                       | > 6 years           | Progressive                                                                                                      | Alive at                   | Progressive motor                                                      |

|        |   |                                 |     |                          |             |                           |                       |                                                                                      |
|--------|---|---------------------------------|-----|--------------------------|-------------|---------------------------|-----------------------|--------------------------------------------------------------------------------------|
|        |   | European (British)              |     |                          |             | problems with schooling   | age 25 years          | disorder with psychiatric features                                                   |
| F337   | M | White European (Italian)        | No  | No                       | 18 months   | Focal epileptic seizures  | Alive at age 20 years | Severe developmental delay                                                           |
| F343   | M | White European (Dutch)          | No  | No                       | 9 years     | Abnormal gait             | Alive at age 34 years | Can walk with support; demonstrates extrapyramidal, spastic and ataxic signs         |
| F344   | M | East African (Somali)           | Yes | No                       | 7 weeks     | Focal epileptic seizures  | Alive at age 10 years | Progressive neurological decline                                                     |
| F362_1 | F | White European (British)        | No  | 1 of 3 affected siblings | < 6 months  | Developmental delay       | Alive at age 10 years | Moderate developmental delay                                                         |
| F362_2 | F | White European (British)        | No  | 1 of 3 affected siblings | < 18 months | Developmental delay       | Alive at age 8 years  | Mild developmental delay                                                             |
| F362_3 | M | White European (British)        | No  | 1 of 3 affected siblings | < 6 months  | Developmental delay       | Alive at age 4 years  | Mild developmental delay                                                             |
| F414   | M | White European (Finnish)        | No  | No                       | 25 years    | Headaches and memory loss | Alive at age 36 years | Progressive spasticity requiring wheelchair use                                      |
| F426_1 | M | White European (North American) | No  | 1 of 2 affected siblings | < 6 months  | Developmental delay       | Alive at age 20 years | Severe developmental delay with dystonic spastic disorder                            |
| F426_2 | M | White European (North American) | No  | 1 of 2 affected siblings | < 6 months  | Developmental delay       | Alive at age 19 years | Some intellectual delay with dystonia and spasticity although can walk with aids and |

|        |   |                                 |     |                          |                     |                                              |                       |                                                                            |
|--------|---|---------------------------------|-----|--------------------------|---------------------|----------------------------------------------|-----------------------|----------------------------------------------------------------------------|
| F433   | M | White European (British)        | No  | No                       | 54 years            | Progressive hemiparesis                      | Died at age 58 years  | works semi-independently<br>Progressive neurological decline in adulthood  |
| F445   | F | White European (British)        | No  | No                       | < 6 months          | Seizures                                     | Alive at age 6 years  | Asymmetrical dystonia with some learning difficulties                      |
| F446   | M | White European (British)        | Yes | No                       | 10 months           | Focal epileptic seizures                     | Died at age 13 years  | Progressive neurological decline                                           |
| F454_1 | F | White European (Canadian)       | No  | 1 of 2 affected siblings | Scan at age 5 years | Scan undertaken in absence of symptoms       | Alive at age 11 years | Minor learning problems and some subtle focal motor signs on examination   |
| F454_2 | F | White European (Canadian)       | No  | 1 of 2 affected siblings | 7 months            | Epileptic seizures                           | Alive at age 7 years  | Moderate developmental delay with focal neurological signs                 |
| F465   | M | Mixed white European            | No  | No                       | 15 months           | Epileptic seizures                           | Alive at age 10 years | Some intellectual delay and dyskinesia                                     |
| F521_1 | F | White European (North American) | No  | 1 of 2 affected siblings | < 12 months         | Subtle delays in development                 | Alive at age 13 years | Some behavioral issues, but otherwise intellectually and physically intact |
| F521_2 | M | White European (North American) | No  | 1 of 2 affected siblings | < 6 months          | Developmental delay                          | Alive at age 9 years  | Severe psychomotor delay                                                   |
| F551   | F | White European (Belgium)        | No  | No                       | Infancy             | Dystonic quadriplegia obvious by age 3 years | Died at age 28 years  | Progressive neurological decline in adulthood                              |
| F564   | M | White                           | No  | No                       | 9 months            | Developmental                                | Alive at              | Unable to walk                                                             |

|        |   |                                 |    |                          |            |                                                                          |                       |                                                   |
|--------|---|---------------------------------|----|--------------------------|------------|--------------------------------------------------------------------------|-----------------------|---------------------------------------------------|
|        |   | European (Belgium)              |    |                          |            | delay                                                                    | age 8 years           | due to spasticity. Dysarthria. Uses sign language |
| F691   | M | White European (British)        | No | No                       | < 4 months | Developmental delay                                                      | Alive at age 4 years  | Severe developmental delay                        |
| F730   | F | White European (Australian)     | No | No                       | 2 months   | Epileptic seizures                                                       | Alive at age 6 years  | Severe developmental delay                        |
| F766   | F | White European (British)        | No | No                       | 12 years   | Motor deterioration with previous diagnosis of mild cerebral palsy       | Alive at age 16 years | Progressive motor deterioration with dysarthria   |
| F780_1 | F | White European (North American) | No | 1 of 2 affected siblings | 7 years    | Attention deficit on background of prematurity                           | Alive at age 13 years | Cognitive slowing, tremor, ataxia and epilepsy    |
| F780_2 | F | White European (North American) | No | 1 of 2 affected siblings | 6 years    | Minor developmental problems (scanned in view of her sister's diagnosis) | Alive at age 7 years  | Stable with minimal features                      |
| F819_1 | M | White European (British)        | No | 1 of 2 affected siblings | Teens      | Epileptic seizures                                                       | Alive at age 35 years | Some intellectual delay with hemiparesis          |
| F819_2 | F | White European (British)        | No | 1 of 2 affected siblings | Teens      | Epileptic seizures                                                       | Alive at age 32 years | No major deficits                                 |
| F906   | M | White European (Italian)        | No | No                       | 18 months  | Developmental delay and monoparesis                                      | Alive at age 5 years  | Mild hemiplegia                                   |
| F1127  | M | White European (French)         | No | No                       | < 6 months | Developmental delay                                                      | Alive at age 2 years  | Moderate developmental delay                      |
| F1172  | F | White European (German)         | No | No                       | 50 years   | Ataxia                                                                   | Alive at age 54 years | Minor degree of ataxia and dysarthria but no      |

|       |   |                                               |    |    |          |                    |                       |                                                                            |
|-------|---|-----------------------------------------------|----|----|----------|--------------------|-----------------------|----------------------------------------------------------------------------|
| F1288 | F | White European (North American)               | No | No | 3 years  | Gait problems      | Alive at age 17 years | major functional deficit<br>Mainly unilateral dystonia / spasticity        |
| F1424 | F | Mixed White European (German) / North African | No | No | 6 months | Epileptic seizures | Alive at age 9 years  | Progressive motor disorder with psychiatric features                       |
| F1445 | F | Mixed White European (British) / Asian        | No | No | 10 years | Gait problems      | Alive at age 10 years | Probably slowly progressive motor deterioration with learning difficulties |

**Supplementary Table 1. Clinical table**

| Genomic coordinates†  | rs number   | SNORD118 nomenclature ^ | ExAC total allele count | Hom* | Het** | Calculated ExAC frequency | Highest population frequency on ExAC‡ | Families harboring each variant                |
|-----------------------|-------------|-------------------------|-------------------------|------|-------|---------------------------|---------------------------------------|------------------------------------------------|
| g.8076761C>A          | rs116395281 | n.*10G>T                | 112348                  | 1    | 231   | 0.002056                  | African 0.01891 (1)                   | F172, F331, F334, F730                         |
| g.8076762G>A          | rs201787275 | n.*9C>T                 | 112400                  | 1    | 227   | 0.00202                   | European 0.00303 (1)                  | F551, F691, F819, F1127, F1172, F1288          |
| g.8076766G>C          | rs75008470  | n.*5C>G                 | 112440                  | 0    | 65    | 0.0005781                 | Other 0.00119 (0)                     | F285, F343, F362, F426, F433, F445, F446, F454 |
| g.8076770G>A          | rs117595965 | n.*1C>T                 | 112476                  | 4    | 532   | 0.00473                   | European 0.00708 (3)                  | F414, F564, F780, F819                         |
| g.8076776G>C          |             | n.131C>G                | 112572                  | 0    | 0     | Novel                     | Novel                                 | F309, F521, F780, F1172                        |
| g.8076777A>G          |             | n.130T>C                | 112568                  | 0    | 0     | Novel                     | Novel                                 | F1424                                          |
| g.8076780G>C          |             | n.127C>G                | 112750                  | 0    | 6     | 0.00005322                | East Asian 0.00024 (0)                | F445, F551                                     |
| g.8076781G>A          | rs144429028 | n.126C>T                | 112748                  | 0    | 11    | 0.00009756                | European 0.00013 (0)                  | F564                                           |
| g.8076794G>A          |             | n.113C>T                | 112774                  | 0    | 2     | 0.00001773                | European 0.000033 (0)                 | F344#                                          |
| g.8076803C>T          | rs201686383 | n.104G>A                | 112774                  | 0    | 55    | 0.0004877                 | European (Finnish) 0.00107 (0)        | F521                                           |
| g.8076804C>T          |             | n.103G>A                | 112776                  | 0    | 2     | 0.00001773                | East Asian 0.00012 (0)                | F906                                           |
| g.8076807A>C          |             | n.100T>G                | 112782                  | 0    | 0     | Novel                     | Novel                                 | F1127                                          |
| g.8076825T>C          |             | n.82A>G                 | 112786                  | 0    | 8     | 0.00007093                | East Asian 0.00012 (0)                | F330, F334, F465                               |
| g.8076826C>G          |             | n.81G>C                 | 112788                  | 0    | 0     | Novel                     | Novel                                 | F281                                           |
| g.8076826C>T          |             | n.81G>A                 | 112788                  | 0    | 4     | 0.00003546                | East Asian 0.00012 (0)                | F426, F730, F1445                              |
| g.8076832T>C          |             | n.75A>G                 | 112788                  | 0    | 0     | Novel                     | Novel                                 | F278                                           |
| g.8076835T>C          | rs201558321 | n.72A>G                 | 112794                  | 0    | 8     | 0.00007093                | South Asian 0.00018 (0)               | F331                                           |
| g.8076846T>C          |             | n.61A>G                 | 112788                  | 0    | 9     | 0.0000798                 | European 0.00011 (0)                  | F414                                           |
| g.8076846_8076847insA |             | n.60_61insT             | 112788                  | 0    | 2     | 0.00001773                | African 0.00024 (0)                   | F465                                           |
| g.8076848A>C          |             | n.59T>G                 | 112780                  | 0    | 0     | Novel                     | Novel                                 | F1288                                          |
| g.8076849T>C          |             | n.58A>G                 | 112788                  | 0    | 3     | 0.0000266                 | South Asian 0.00012                   | F691                                           |



|                       |             |              |        |   |     |             |                                | (0)               |
|-----------------------|-------------|--------------|--------|---|-----|-------------|--------------------------------|-------------------|
| g.8076849dup          |             | n.58dup      | 112788 | 0 | 0   | Novel       | Novel                          | F337              |
| g.8076850C>T          |             | n.57G>A      | 112784 | 0 | 0   | Novel       | Novel                          | F285              |
| g.8076851dup          |             | n.56dup      | 112774 | 0 | 0   | Novel       | Novel                          | F172              |
| g.8076865C>T          | rs148909909 | n.42G>A      | 112762 | 0 | 115 | 0.00102     | African 0.00343 (0)            | F766              |
| g.8076868C>G          | rs200458465 | n.39G>C      | 112734 | 0 | 16  | 0.0001419   | Other 0.0012 (0)               | F906              |
| g.8076887G>A          |             | n.20C>T      | 112754 | 0 | 2   | 0.00001774  | East Asian 0.00012 (0)         | F362, F433        |
| g.8076899C>G          |             | n.8G>C       | 112740 | 0 | 1   | 0.00000887  | African 0.00012 (0)            | F278, F344#       |
| g.8076899C>T          | rs201266955 | n.8G>A       | 112740 | 3 | 316 | 0.002803    | European 0.0161 (2)            | F330              |
| g.8076904G>A          | rs117735243 | n.3C>T       | 112682 | 2 | 166 | 0.001473    | European (Finnish) 0.00562 (0) | F281, F309, F1445 |
| g.8076904G>T          | rs117735243 | n.3C>A       | 112682 | 0 | 1   | 0.000008875 | European 0.000016 (0)          | F766              |
| g.8076905A>G          |             | n.2T>C       | 112676 | 0 | 4   | 0.0000355   | South Asian 0.000062 (0)       | F337              |
| g.8076912C>T          | rs200531412 | n.-6G>A      | 112690 | 0 | 108 | 0.0009584   | East Asian 0.00183 (0)         | F1424             |
| g.8076885_8076913dup  |             | n.-7_22dup   | 112752 | 0 | 0   | Novel       | Novel                          | F343              |
| g.8076955_8076960del  |             | n.-54_-49del | 111546 | 0 | 0   | Novel       | Novel                          | F454              |
| g.8076696_8076977del§ |             |              |        |   |     | Novel       | Novel                          | F819              |

**Supplementary Table 2. List of *SNORD118* variants identified in patients with LCC.** Characteristics of variants identified and their frequency on ExAC are given by family number.

Hom = homozygous; Het = heterozygous; ExAC = Exome Aggregate consortium

†All genomic coordinates should be preceded by Chr17(GRCh37):

^ *SNORD118* NR\_033294.1

TMEM107 NM\_032354.3

\* Number of homozygote alleles recorded in ExAC for each variant

\*\* Number of heterozygote alleles recorded in ExAC for each variant

‡ Number in brackets is the number of homozygote alleles recorded in the population with the highest frequency on ExAC

§ Deletion extends beyond these boundaries, but boundaries have not been fully defined

# In F344 both of these rare variants were seen in the homozygous state; however, n.8G>C was also seen in F278, suggesting that this is the likely pathogenic variant

| Marker  | F906 proband |          | F906 father |          | F906 mother |          |
|---------|--------------|----------|-------------|----------|-------------|----------|
|         | Allele 1     | Allele 2 | Allele 1    | Allele 2 | Allele 1    | Allele 2 |
| AMEL    | X            | Y        | X           | Y        | X           | X        |
| CSF1PO  | 11           | 11       | 11          | 12       | 10          | 11       |
| D13S317 | 11           | 12       | 8           | 12       | 11          | 12       |
| D16S539 | 9            | 10       | 9           | 11       | 10          | 11       |
| D18S51  | 11           | 15       | 14          | 15       | 11          | 21       |
| D21S11  | 29           | 30       | 29          | 29       | 28          | 30       |
| D3S1358 | 14           | 15       | 15          | 15       | 14          | 17       |
| D5S818  | 10           | 12       | 12          | 12       | 10          | 12       |
| D7S820  | 8            | 8        | 8           | 11       | 8           | 10       |
| D8S1179 | 12           | 16       | 12          | 13       | 12          | 16       |
| FGA     | 19           | 23       | 19          | 23       | 23          | 26       |
| Penta_D | 11           | 12       | 12          | 12       | 11          | 13       |
| Penta_E | 13           | 15       | 12          | 13       | 15          | 16       |
| TH01    | 6            | 7        | 6           | 7        | 6           | 7        |
| TPOX    | 8            | 12       | 8           | 12       | 8           | 8        |
| vWA     | 15           | 17       | 15          | 18       | 17          | 17       |

**Supplementary Table 3. Microsatellite analysis undertaken in F906.** Polymorphic microsatellite markers were genotyped using DNA from the affected child and his parents to confirm maternity and paternity indicating the *de novo* occurrence of an n.103G>A nucleotide alteration.

|                     | <b>Total</b> | <b>Total WT (only variants &gt;0.5%)</b> | <b>Total carrying 1 rare variant (&lt;0.5%)</b> | <b>Total with 2 or more rare variants (&lt;0.5%)</b> | <b>Total with 2 rare variants on different alleles (&lt;0.5%)</b> | <b>Total with a novel variant (not found on ExAC)</b> |
|---------------------|--------------|------------------------------------------|-------------------------------------------------|------------------------------------------------------|-------------------------------------------------------------------|-------------------------------------------------------|
| <b>Controls</b>     | 677          | 587                                      | 84                                              | 6                                                    | 4†                                                                | 4                                                     |
| <b>LCC probands</b> | 33           | 0                                        | 0                                               | 33                                                   | 20*                                                               | 11                                                    |

**Supplementary Table 4. Panel of 413 European control DNA samples sequenced for variants in *SNORD118* showing the number of individuals carrying rare variants in comparison to patients.**

WT = wild-type

\*20 families where parental inheritance could be determined (i.e. 18 probands with available parental samples plus two probands homozygous for a putative mutation in *SNORD118* but where parental DNA was not available: F278, F281, F331, F337, F362, F426, F454, F465, F521, F691, F766, F780, F819, F906, F1127, F1288, F1424, F1445, F344, F446)

Chi squared test for number with 2 rare variants  $p < 0.000005$

†Variants identified in an additional control sample not cloned, therefore assumed to be on separate alleles

| Genomic coordinates† | rs number   | SNORD118 nomenclature^ | Seen in LCC cohort? | ExAc allele count (hom/het/total) | Calculated ExAc frequency | Variants on same allele or different allele? |
|----------------------|-------------|------------------------|---------------------|-----------------------------------|---------------------------|----------------------------------------------|
| g.8076843C>T         | rs372252345 | n.64G>A                | No                  | 0/6/112786                        | 0.0000532                 | Variants on same allele                      |
| g.8076883G>A         | rs368022715 | n.24C>T                | No                  | 0/34/112758                       | 0.000302                  | Variants on same allele                      |
| g.8076751T>C         | rs143573551 | n.*20A>G               | No                  | 0/93/112218                       | 0.000829                  | Variants on different alleles                |
| g.8076912C>A         | rs200531412 | n.-6G>T                | No                  | 6/372/112690                      | 0.003301                  | Variants on different alleles                |
| g.8076676G>A         | rs78425352  | n.*95C>T               | No                  |                                   | 0.005 (1000G)             | Variants on same allele                      |
| g.8076757T>C         | rs115989975 | n.*14A>G               | No                  | 0/57/112288                       | 0.000508                  | Variants on same allele                      |
| g.8076874G>A         | rs116658491 | n.33C>T                | No                  | 18/1092/112760                    | 0.009684                  | Variants on different alleles                |
| g.8076918G>A         | rs201296288 | n.-12C>T               | No                  | 2/405/112316                      | 0.003606                  | Variants on different alleles                |
| g.8076827A>C         | rs374183932 | n.80T>G                | No                  | 0/6/112788                        | 0.0000532                 | Variants on different alleles                |
| g.8076722T>C         | rs73975808  | n.*49A>G               | No                  | 0/37/111778                       | 0.000331                  | Variants on different alleles                |
| g.8076761C>A         | rs116395281 | n.*10G>T               | Yes                 | 1/231/112348                      | 0.002056                  | Variants on different alleles*               |
| g.8076791G>A         | rs181334320 | n.116C>T               | No                  | 2/443/112746                      | 0.003929                  | Variants on different alleles*               |

**Supplementary Table 5. Cloning of six control DNA samples found to carry two rare variants in SNORD118 to determine bi- or monoallelic status.**

Hom, homozygous; het, heterozygous

†All genomic coordinates should be preceded by Chr17(GRCh37):

1000G variant only identified on 1000 genomes

^ SNORD118 NR\_033294.1.

TMEM107 NM\_032354.3

\*DNA not cloned therefore variants assumed to be on separate alleles

| 'First' variant | ExAC frequency | Family | 'Second' variant     | ExAC frequency |
|-----------------|----------------|--------|----------------------|----------------|
| n.*10G>T        | 0.002056       | F172   | n.56dup              | Novel          |
|                 |                | F331   | n.72A>G              | 0.00007093     |
|                 |                | F334   | n.82A>G              | 0.00007093     |
|                 |                | F730   | n.81G>A              | 0.00003546     |
| n.*9C>T         | 0.00202        | F551   | n.127C>G             | 0.00005322     |
|                 |                | F691   | n.58A>G              | 0.0000266      |
|                 |                | F819   | g.8076696_8076977del | Novel          |
|                 |                | F1127  | n.100T>G             | Novel          |
|                 |                | F1172  | n.131C>G             | Novel          |
|                 |                | F1288  | c.59T>G              | Novel          |
| n.*1C>T         | 0.00473        | F414   | n.61A>G              | 0.000079809    |
|                 |                | F564   | n.126C>T             | 0.00009756     |
|                 |                | F780   | n.131C>G             | Novel          |
|                 |                | F819   | g.8076696_8076977del | Novel          |
| n.42G>A         | 0.00102        | F766   | n.3C>A               | 0.000008875    |
| n.8G>A          | 0.002803       | F330   | n.82A>G              | 0.00007093     |
| n.3C>T          | 0.001473       | F281   | n.81G>C              | Novel          |
|                 |                | F309   | n.131C>G             | Novel          |
|                 |                | F1445  | n.81G>A              | 0.00003546     |

**Supplementary Table 6.** Allelic combinations seen in each family harboring one of the six putative mutant alleles in *SNORD118* with an allele frequency on the Exome Aggregation Consortium (ExAC) database of between 0.001 and 0.005.

|                          | Single recorded allele on ExAC | Number of variants on ExAC with an allele frequency of <0.005 (excluding those seen only once) | Number of variants on ExAC with an allele frequency of >0.005 |
|--------------------------|--------------------------------|------------------------------------------------------------------------------------------------|---------------------------------------------------------------|
| 3'UTR (n.*1 to n.*49)    | 27                             | 75                                                                                             | 2                                                             |
| Coding (n.1 to n.136)    | 74                             | 199                                                                                            | 9                                                             |
| Promoter (n.-50 to n.-1) | 15                             | 36                                                                                             | 5                                                             |
| Total                    | 116                            | 310                                                                                            | 16                                                            |
| Percentage               | 26.2                           | 70.1                                                                                           | 3.6                                                           |

**Supplementary Table 7. Sequence variants across *SNORD118* recorded on the Exome Aggregation Consortium (ExAC) database.**

| Amplicon                                                    | Primer name         | Sequence                                           |
|-------------------------------------------------------------|---------------------|----------------------------------------------------|
| Primers for patient and control sequencing                  | U8 F                | ACTGCCTAAATTCCAGAAAGCA                             |
|                                                             | U8 R                | TGATCGGAGCATTCTGGGAA                               |
| Primers to make templates for <i>in vitro</i> transcription | Long pGEM F         | TGGTACTACGGTAGGTGCC                                |
|                                                             | Long pGEM R         | AGACAAACAGCAAGGTTATCCC                             |
| Primers for construct for luciferase cloning                | Short pGEM F        | TGGTACTACGGTAGGTGCC                                |
|                                                             | Short pGEM R        | ACGATACAGACAAACAGCCG                               |
| Primers for subcloning into pGL3                            | <i>KpnI</i> forward | AGTGAGGTACCTGGTACTACGGTAGGTGCC                     |
|                                                             | <i>KpnI</i> reverse | AGTGAAAGCTTACGATACAGACAAACAGCCG                    |
| Primers for site directed mutagenesis                       | PSEDel F            | CGCGTTATGAACTCACCCGTAACGGAATCTTTTTCA               |
|                                                             | PSEDel R            | TGAAAAAGATTCCGTTACGGGTGAGTTCATAACGCG               |
|                                                             | n.58A>G F           | GCAGATTAGAACATGGTGATTGGAGATGCAT                    |
|                                                             | n.58A>G R           | ATGCATCTCCAATCACCATGTTCTAATCTGC                    |
|                                                             | n.61A>G F           | GATTAGAACATGATGGTTGGAGATGCATGAA                    |
|                                                             | n.61A>G R           | TTCATGCATCTCCAACCATCATGTTCTAATC                    |
| Transcription template primers                              | U8 F Trx            | GGTAATACGACTCACTATAGGGATCGTCAGGTGGGATAATCC         |
|                                                             | U8 R Trx            | AATCAGACAGGAGCAATCAGGG                             |
|                                                             | U8 longR Trx        | TAACACAAATGTAAGTGATCGTCAGAAAG                      |
|                                                             | U8 n.*5C>G R Trx    | TAACACAAATGTAAGTGATCGTCACAAAGAATCAGACAGG           |
|                                                             | U8 n.*1C>T R Trx    | TAACACAAATGTAAGTGATCGTCAGAAAAAATCAGACAGG           |
|                                                             | U8 n.*9C>T R Trx    | TAACACAAATGTAAGTGATCATCAGAAAGAATCAGACAGG           |
|                                                             | U8 n.*10C>G R Trx   | TAACACAAATGTAAGTGATAGTCAGAAAGAATCAGACAGG           |
| 15.5K cloning primers                                       | 15.5KF2 Nde TEV     | CATATGGAAAACCTGTATTTTCAGGGCATGACTGAGGCTGATGTGAATCC |
|                                                             | 15.5KB Xho          | CTCGAGTTAGACTAAGAGCCTTTCAATGG                      |



**Supplementary Table 8. Primers used to amplify human *SNORD118* and surrounding region.**
